# Supplementary material for: Polyphenolic QTOF-ESI MS Characterization and the Antioxidant and Cytotoxic Activities of Prunus domestica Commercial Cultivars from Costa Rica
Source: MDPI journal article supplement (doi:10.3390/molecules26216493), 2021-10-27
Supplement: s1 [file s1]

**Table S1.** Profile of phenolic compounds identified by UPLC-ESI-QTOF MS analysis for plum skin (S) and flesh (F) samples under PLE neutral and acidic conditions.

| #                                     | [M-H]-   | tR<br>(min) | MS2 fragments                     | Formula   | Satsuma<br>(neutral) |   | Methley<br>(neutral) |   | Pisardii<br>(neutral) |   | Satsuma<br>(acid) |   | Methley<br>(acid) |   | Pisardii<br>(acid) |   |
|---------------------------------------|----------|-------------|-----------------------------------|-----------|----------------------|---|----------------------|---|-----------------------|---|-------------------|---|-------------------|---|--------------------|---|
|                                       |          |             |                                   |           | S                    | F | S                    | S | F                     | S | S                 | F | S                 | S | F                  | S |
| Hydroxycinnamic acids and derivatives |          |             |                                   |           |                      |   |                      |   |                       |   |                   |   |                   |   |                    |   |
| 1                                     | 529.1365 | 2.89        | [529]: 353, 367, 191, 179         | C26H25O12 |                      | x | x                    |   |                       | x |                   |   |                   |   |                    |   |
| 3                                     | 325.0917 | 4.42        | [325]: 145, 163, 187              | C15H17O8  |                      |   |                      |   |                       |   | x                 |   | x                 |   |                    |   |
| 5                                     | 341.0884 | 7.13        | [341]: 161, 179                   | C15H17O9  | x                    |   | x                    |   | x                     | x | x                 | x | x                 | x | x                  | x |
| 6                                     | 353.0869 | 7.56        | [353]: 191, 145                   | C16H17O9  | x                    |   | x                    | x | x                     | x | x                 | x | x                 | x | x                  | x |
| 7                                     | 325.0917 | 7.96        | [325]: 145, 163, 187              | C15H17O8  | x                    |   | x                    | x |                       | x |                   |   |                   |   |                    |   |
| 12                                    | 325.0917 | 9.98        | [325]: 145                        | C15H17O8  | x                    | x | x                    |   | x                     | x | x                 | x | x                 | x | x                  | x |
| 13                                    | 367.1021 | 10.23       | [367]: 161 , 134                  | C17H19O9  | x                    | x | x                    |   | x                     | x |                   |   | x                 |   | x                  |   |
| 15                                    | 367.1021 | 11.45       | [367]: 193 , 134                  | C17H19O9  | x                    | x | x                    | x | x                     | x | x                 | x | x                 | x | x                  | x |
| 19                                    | 529.1365 | 12.8        | [529]: 353, 367, 191, 179         | C26H25O12 |                      |   | x                    |   |                       | x | x                 | x | x                 | x | x                  | x |
| 21                                    | 337.0919 | 14.78       | [337]:173                         | C16H17O8  | x                    |   |                      |   | x                     | x | x                 | x | x                 |   |                    | x |
| 22                                    | 337.0919 | 15.29       | [337]:173                         | C16H17O8  | x                    |   |                      |   |                       | x | x                 | x |                   |   |                    |   |
| 23                                    | 367.1021 | 15.65       | [367]: 193 , 134                  | C17H19O9  | x                    | x | x                    | x | x                     | x |                   |   |                   |   |                    | x |
| 24                                    | 351.1082 | 16.99       | [351]: 177 , 293 , 235 , 191, 133 | C17H19O8  | x                    |   |                      |   | x                     |   |                   |   |                   |   |                    | x |
| 25                                    | 571.1675 | 17.44       | [571]: 553, 529, 511, 487, 307    | C25H31O15 |                      |   | x                    |   | x                     |   | x                 |   | x                 | x | x                  | x |
| 29                                    | 351.1082 | 20.55       | [351]:177 , 293 , 235 , 191, 133  | C17H19O8  | x                    |   | x                    | x |                       | x | x                 |   |                   |   |                    |   |
| 30                                    | 571.1675 | 21.03       | [571]: 529, 511, 307, 175         | C25H31O15 |                      |   | x                    | x |                       |   | x                 | x | x                 | x | x                  | x |
| Flavonoids                            |          |             |                                   |           |                      |   |                      |   |                       |   |                   |   |                   |   |                    |   |
| 4                                     | 447.0913 | 5.89        | [447]: 300, 285                   | C21H19O11 | x                    | x | x                    | x | x                     | x | x                 | x | x                 | x | x                  | x |
| 18                                    | 447.0913 | 12.57       | [447]: 300, 301                   | C21H19O11 | x                    | x |                      | x | x                     |   | x                 | x | x                 | x | x                  |   |
| 31                                    | 463.0901 | 21.95       | [463]: 300, 301                   | C21H19O12 | x                    |   | x                    |   |                       |   | x                 |   | x                 | x | x                  |   |
| 32                                    | 609.1488 | 22.86       | [609]:300, 301                    | C27H29O16 | x                    | x | x                    |   | x                     | x | x                 | x | x                 | x | x                  | x |
| 33                                    | 463.0875 | 23.89       | [463]: 300, 301                   | C21H19O12 | x                    | x | x                    | x | x                     | x | x                 | x | x                 | x | x                  | x |
| 34                                    | 463.0875 | 25.46       | [463]: 300, 301                   | C21H19O12 | x                    |   | x                    |   |                       |   | x                 |   | x                 |   |                    |   |

[illegible]

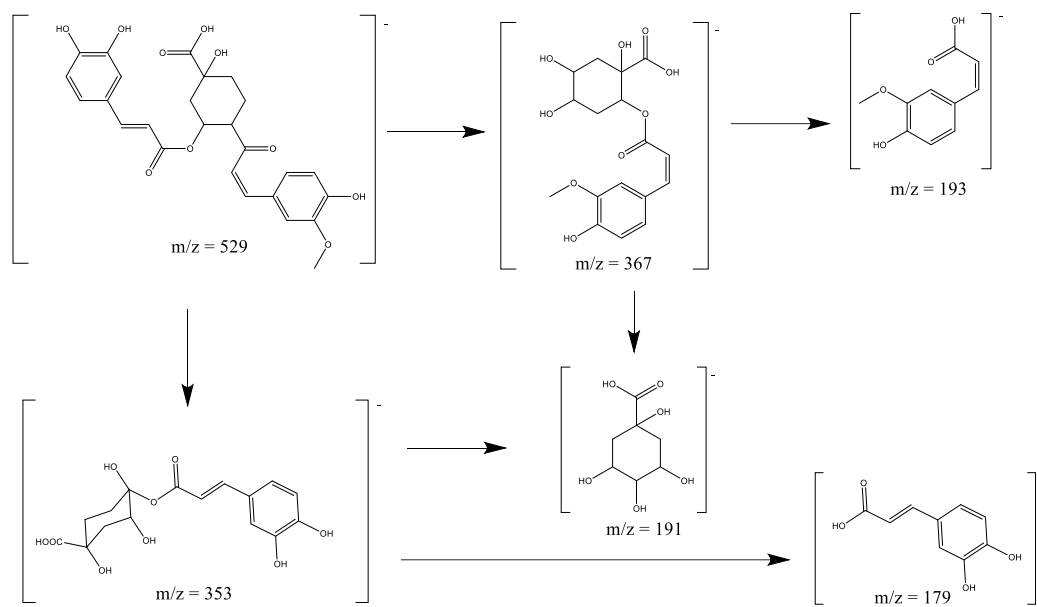

**Figure S1.** Caffeoyl-feruloyl-quinic acid fragmentation pathway.

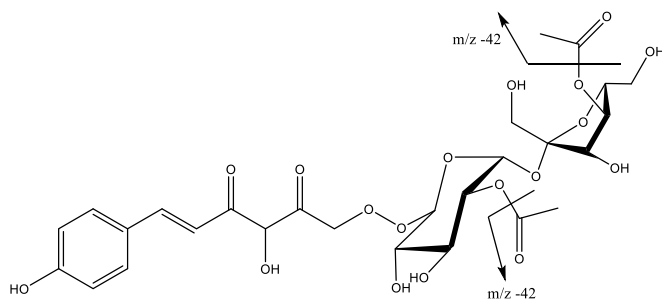

**Figure S2.** Structure and fragmentation of di-O-acetyl-O-*p*-coumaroylsucrose.

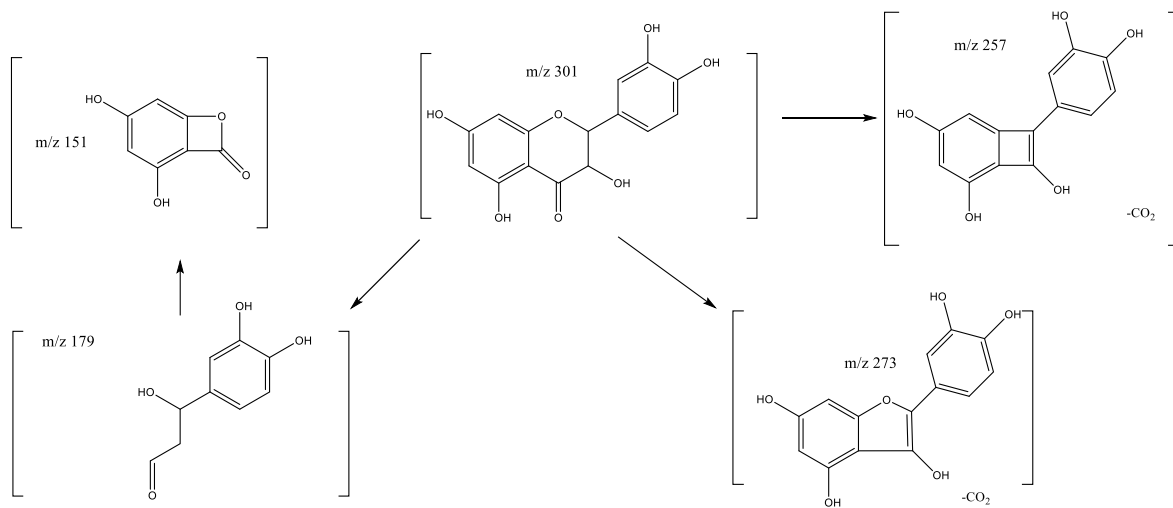

**Figure S3.** Quercetin fragmentation pathway .

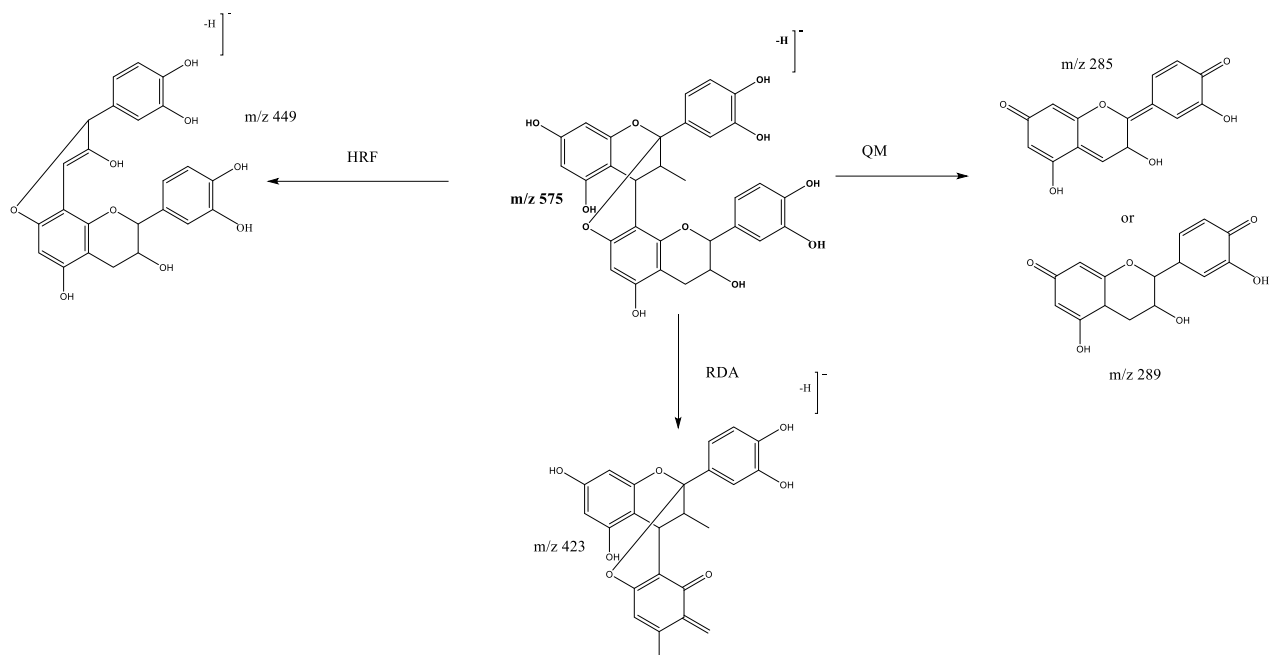

**Figure S4.** Fragmentation pathway of A-type procyanidin dimer showing the products formed by heterocyclic ring fussion (HRF), quinone methide (QM) and retro-Diels–Alder (RDA) reactions.

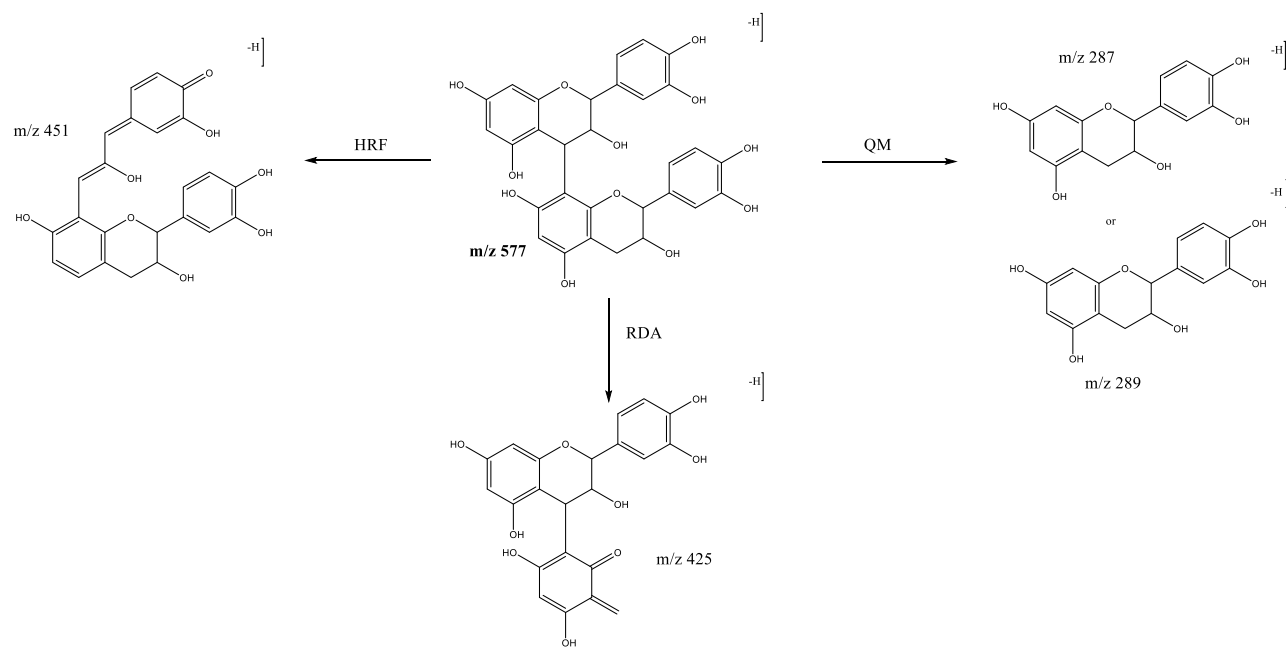

**Figure S5.** Fragmentation pathway of B-type procyanidin dimer showing the products formed by heterocyclic ring fussion (HRF), quinone methide (QM) and retro-Diels–Alder (RDA) reactions.
